# Supplementary material for: A Raman spectroscopic study of uranyl minerals from Cornwall, UK
Source: Royal Society of Chemistry journal article supplement (doi:10.1039/c4ra09361e), 2014-01-01
Supplement: c4ra09361e1.pdf [file c4ra09361e1.pdf]

# A Raman spectroscopic study of uranyl minerals from Cornwall, UK

R J P Driscoll,<sup>a</sup> D Wolverson,<sup>\*a</sup> J M Mitchels,<sup>a</sup> J M Skelton,<sup>a</sup> S C Parker,<sup>a</sup> M Molinari,<sup>a</sup> I Khan,<sup>b</sup>  
D Geeson,<sup>b</sup> and G C Allen<sup>c</sup>

Received Xth XXXXXXXXXXXX 20XX, Accepted Xth XXXXXXXXXXXX 20XX

First published on the web Xth XXXXXXXXXXXX 200X

DOI: 10.1039/b000000x

## SUPPORTING INFORMATION

---

<sup>a</sup> University of Bath, Claverton Down, Bath, UK.

\* Fax: XX XXXX XXXX; Tel: XX XXXX XXXX; E-mail: D.Wolverson@bath.ac.uk

<sup>b</sup> AWE, Aldermaston, Reading, UK.

<sup>c</sup> Interface Analysis Center, University of Bristol, Bristol, UK.

---

## 1 Physical appearance of the uranyl mineral samples

**Autunite** from Merrivale Quarry appears as fine, yellow crystals on a white, grey and black background rock, approximately 6 cm in diameter.

**Torbernite** from Bunny Mine appeared as small (approximately 600  $\mu\text{m}$  across), green, tabular crystals on a grey and brown primary rock, approximately 11 cm in diameter.

**Nováčekite** from Wheal Edward was present as yellow and green flakes on a black and brown primary rock, approximately 5 cm across.

**Zeunerite** from Wheal Gorland appeared as fine green crystals on a light brown background rock, approximately 7 cm across.

**Phosphuranylite** from Wheal Edward occurred as a yellow crust on a brown rock (approximately 7 cm across), with fine, green associated crystals.

**Andersonite and schröckingerite**, both from Geevor Mine, are present as yellow mineral deposits on a brown background rock (both around 4 cm across); both samples have a thin layer of transparent gypsum crystals associated with the uranyl mineral.

**Johannite** from Geevor Mine is present as pale green crystals on a yellow-brown background rock, approximately 5 cm across.

**Natrozippeite** mineral from Geevor Mine occurs as a yellow crust on a black and brown primary rock (about 7 cm across); it is associated with small, green crystals that do not contain a uranyl cation.

**Uranophane** from Wheal Edward is present as a pale yellow crust on a light brown primary rock sample (approximately 7 cm across); it is associated with a black vein of pitchblende.

**Kasolite** from Loe Warren Zawn occurs as an orange-red crust on one face of a large grey primary rock sample, approximately 12 cm across.

**Compregnacite and cuprosklodowskite** were present as dark yellow and green crystals, respectively, on the same sample of brown, black and grey rock from West Wheal Owles.

## 2 Raman peak tables and wavelength comparisons

The tables shown in this section detail the vibrational bands seen in the Raman spectra for each mineral in this investigation. The positions given are an average of the same band seen in multiple spectra of the same sample, and both the standard deviation and the number of spectra in which each peak is seen are given. Literature bands are given; these have typically been deconvoluted. The assignment is based upon that given for the published spectra. The figures shown here illustrate the Raman spectra collected using all three excitation wavelengths for each mineral.

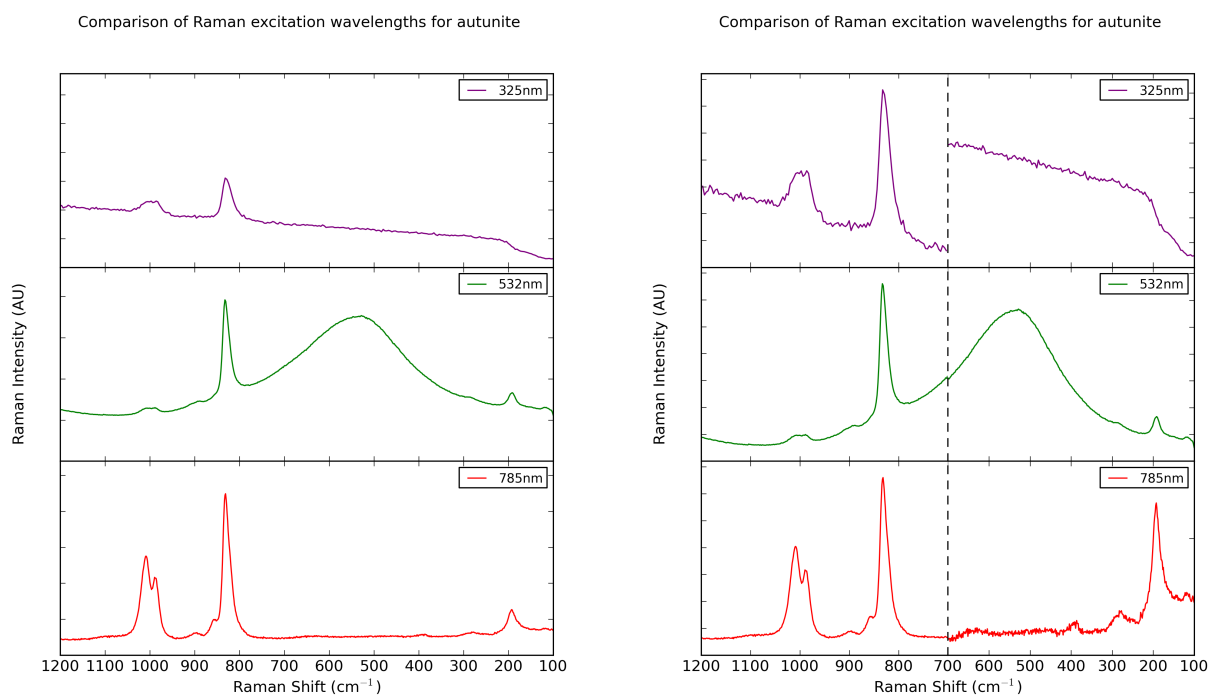

**Fig. SI 1** A comparison of the three laser wavelengths for the uranyl phosphate mineral autunite. The left figure shows the raw spectra. Each section of the spectra shown on the right have been rescaled, separately, to emphasise the bands.

**Table SI 1** Raman spectral bands for the uranyl phosphate mineral autunite

| Position (cm <sup>-1</sup> ) | This Study Standard Deviation | Number of spectra | Literature <sup>2</sup> Position (cm <sup>-1</sup> ) | Attribution                                 |
|------------------------------|-------------------------------|-------------------|------------------------------------------------------|---------------------------------------------|
| 193 †                        | 1.7                           | 31                | 190, 222                                             | Lattice Vibrations                          |
| 283 *                        | 4.2                           | 19                | 291                                                  | $\nu_2(\text{UO}_2)^{2+}$ bend              |
| –                            | –                             | –                 | 399, 406, 439, 464                                   | $\nu_2(\text{PO}_4)^{3-}$ bend              |
| –                            | –                             | –                 | 629                                                  | $\nu_4(\text{PO}_4)^{3-}$ bend              |
| 830                          | 3.6                           | 60                | 816, 822, 833                                        | $\nu_1(\text{UO}_2)^{2+}$ symm. stretch     |
| 899 *                        | 4.93                          | 9                 | –                                                    | $\nu_3(\text{UO}_2)^{2+}$ antisymm. stretch |
| 990                          | 2.67                          | 21                | 988                                                  |                                             |
| 1001 §                       | 7.53                          | 31                | 1007                                                 | $\nu_3(\text{PO}_4)^{3-}$ symm. stretch     |
| 1008                         | 4.16                          | 21                | 1018                                                 |                                             |

Sixty individual spectra were analysed for this sample of autunite.

\* Low intensity or broad bands, not always visible in spectra.

† The 193 cm<sup>-1</sup> peak was most prominent within the 785 nm spectra.

§ The 1001 cm<sup>-1</sup> peak was only visible when the 990 and 1008 cm<sup>-1</sup> peaks were not.

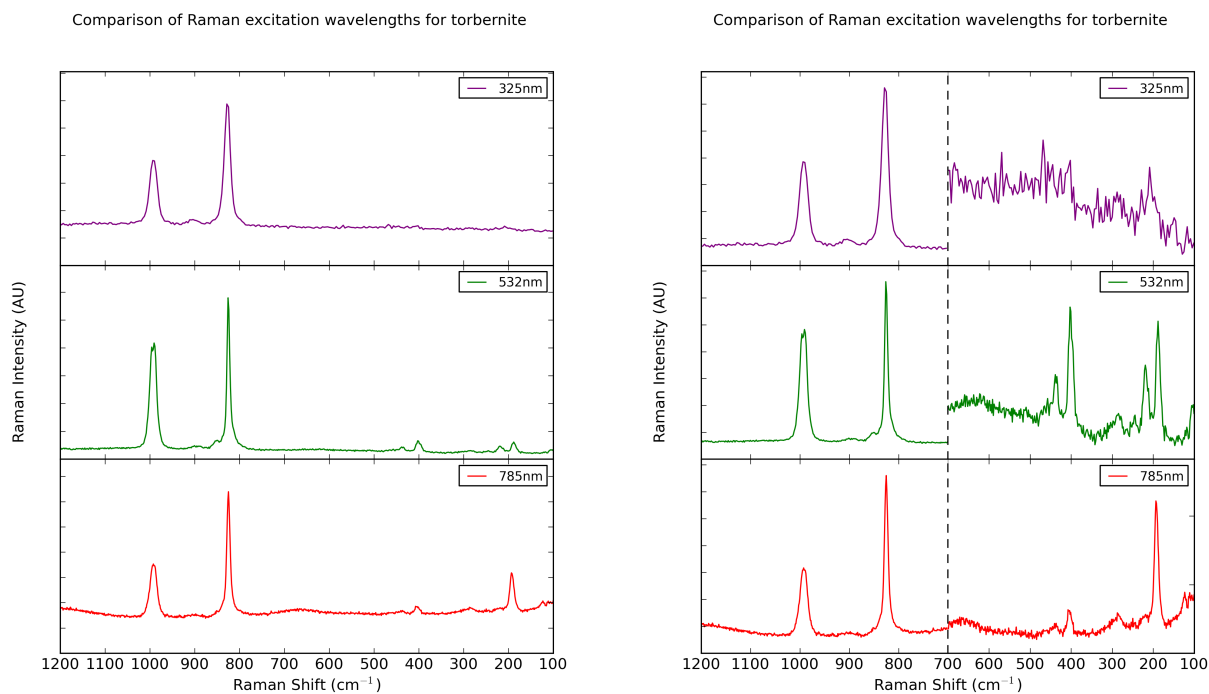

**Fig. SI 2** A comparison of the three laser wavelengths for the uranyl phosphate mineral torbernite. The left figure shows the raw spectra. Each section of the spectra shown on the right have been rescaled, separately, to emphasise the bands.

**Table SI 2** Raman spectral bands for the uranyl phosphate mineral torbernite

| Position<br>(cm <sup>-1</sup> ) | This Study            |                      | Literature <sup>2</sup>         |  | Attribution                                                       |
|---------------------------------|-----------------------|----------------------|---------------------------------|--|-------------------------------------------------------------------|
|                                 | Standard<br>Deviation | Number<br>of spectra | Position<br>(cm <sup>-1</sup> ) |  |                                                                   |
| 191 *                           | 2.3                   | 26                   | –                               |  | Lattice Vibrations                                                |
| –                               | –                     | –                    | 222, 290                        |  | v <sub>2</sub> (UO <sub>2</sub> ) <sup>2+</sup> bend              |
| 404 *                           | 2.7                   | 24                   | 399, 406, 439, 464              |  | v <sub>2</sub> (PO <sub>4</sub> ) <sup>3-</sup> bend              |
| 440 *                           | 3.9                   | 9                    |                                 |  |                                                                   |
| –                               | –                     | –                    | 629                             |  | v <sub>4</sub> (PO <sub>4</sub> ) <sup>3-</sup> bend              |
| 825                             | 1.8                   | 38                   | 808, 826                        |  | v <sub>1</sub> (UO <sub>2</sub> ) <sup>2+</sup> symm. stretch     |
| 903 *                           | 2.1                   | 10                   | 900                             |  | v <sub>3</sub> (UO <sub>2</sub> ) <sup>2+</sup> antisymm. stretch |
| 992                             | 1.75                  | 38                   | 957, 988, 995, 1004             |  | v <sub>3</sub> (PO <sub>4</sub> ) <sup>3-</sup> antisymm. stretch |

Thirty eight individual spectra were analysed for this sample of torbernite.

\* Low intensity or broad bands, not always visible in spectra.

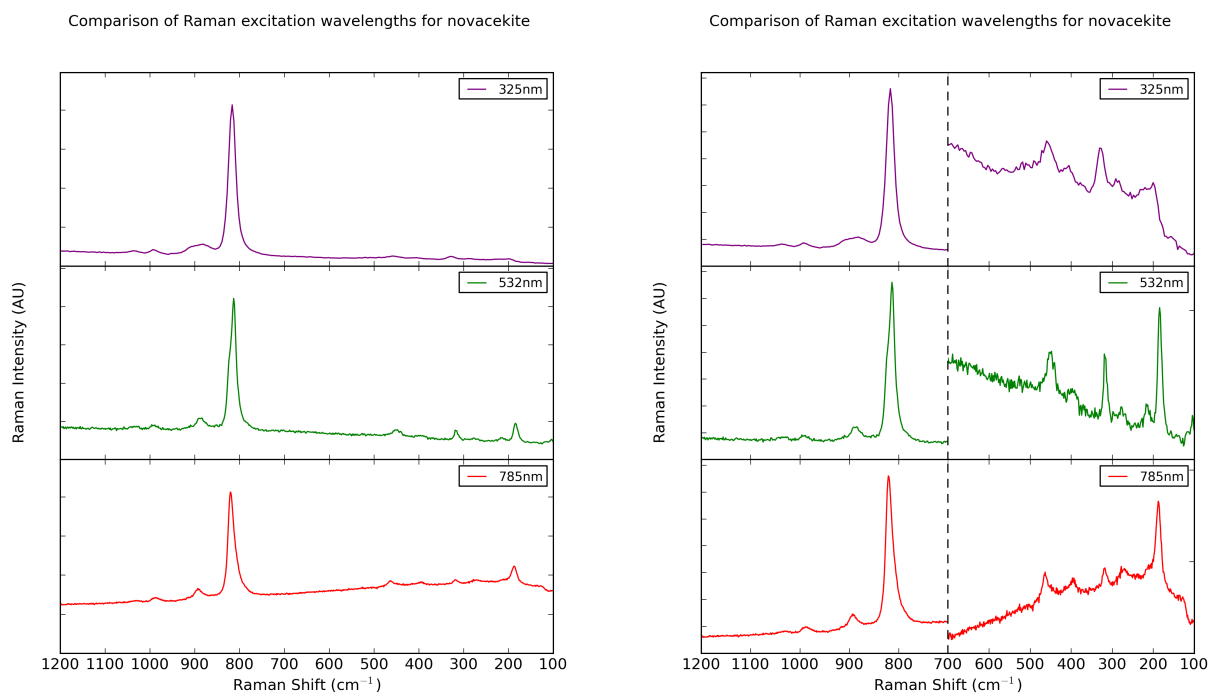

**Fig. SI 3** A comparison of the three laser wavelengths for the uranyl arsenate mineral nováčekite. The left figure shows the raw spectra. Each section of the spectra shown on the right have been rescaled, separately, to emphasise the bands.

**Table SI 3** Raman spectral bands for the uranyl arsenate mineral nováčekite

| Position<br>(cm <sup>-1</sup> ) | This Study            |                      | Literature <sup>10</sup>                      | Literature <sup>2</sup> | Attribution                                 |
|---------------------------------|-----------------------|----------------------|-----------------------------------------------|-------------------------|---------------------------------------------|
|                                 | Standard<br>Deviation | Number<br>of spectra | Saléite Peak<br>Positions (cm <sup>-1</sup> ) |                         |                                             |
| 185                             | 2.9                   | 28                   | 177, 196                                      | –                       | Lattice Vibrations                          |
| 269 *                           | 6.0                   | 10                   | 218, 234, 283                                 | 284                     | $\nu_2(\text{UO}_2)^{2+}$ bend              |
| 325 *                           | 4.3                   | 14                   | 376, 405, 446, 471                            | 389                     | $\nu_2(\text{PO}_4)^{3-}$ bend              |
| 452 *                           | 2.6                   | 10                   |                                               |                         | or                                          |
| 471 *                           | 5.5                   | 8                    |                                               |                         | $\nu_2(\text{AsO}_4)^{3-}$ bend             |
| –                               | –                     | –                    | 573, 612                                      | 643                     | $\nu_4(\text{PO}_4)^{3-}$ bend              |
| 817                             | 2.6                   | 55                   | 827, 843                                      | 818, 833, 847           | $\nu_1(\text{UO}_2)^{2+}$ symm. stretch     |
| 889                             | 5.6                   | 36                   | 896                                           | –                       | $\nu_3(\text{UO}_2)^{2+}$ antisymm. stretch |
| 989                             | 2.3                   | 11                   | 980, 994, 1007                                | 982, 988, 1007          | $\nu_3(\text{PO}_4)^{3-}$ antisymm. stretch |
| 1034 *                          | 2.6                   | 7                    |                                               |                         |                                             |

Fifty five individual spectra were analysed for this sample of nováčekite.

No literature spectra are available for a direct comparison with nováčekite, so its spectrum has been compared against saléite, its phosphate analogue.

\* Low intensity or broad bands, not always visible in spectra.

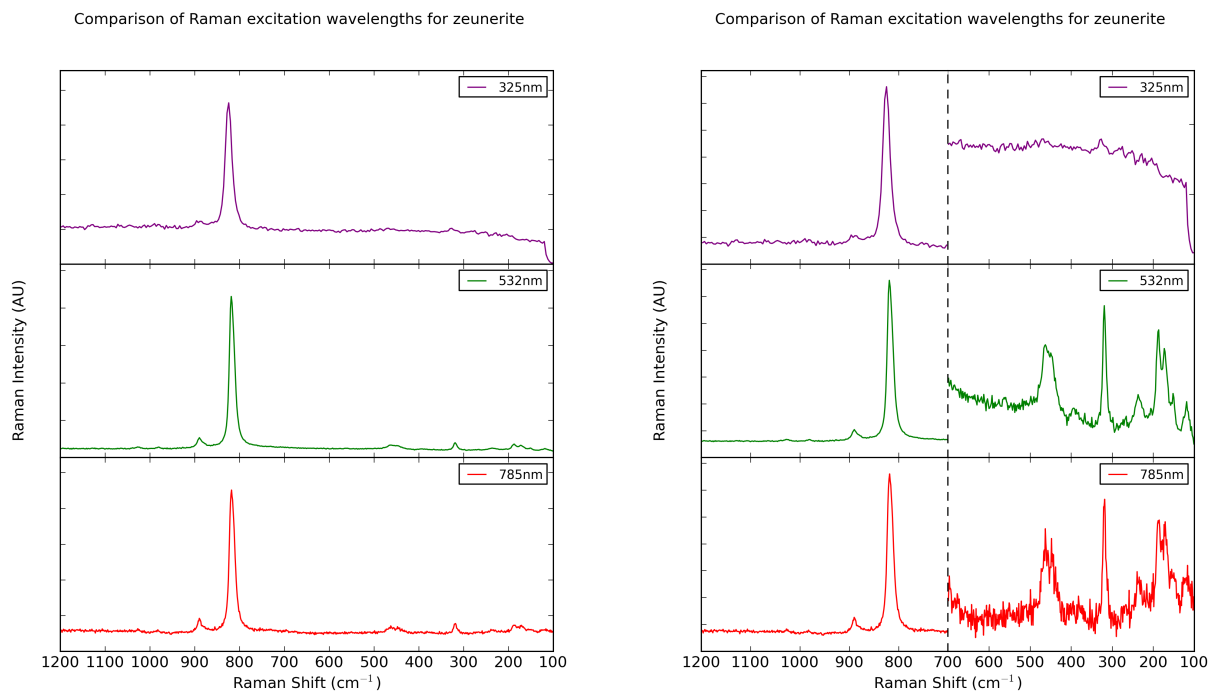

**Fig. SI 4** A comparison of the three laser wavelengths for the uranyl arsenate mineral zeunerite. The left figure shows the raw spectra. Each section of the spectra shown on the right have been rescaled, separately, to emphasise the bands.

**Table SI 4** Raman spectral bands for the uranyl arsenate mineral zeunerite

| Position<br>( $\text{cm}^{-1}$ ) | This Study            |                      | Literature <sup>11</sup>         |  | Attribution                                 |
|----------------------------------|-----------------------|----------------------|----------------------------------|--|---------------------------------------------|
|                                  | Standard<br>Deviation | Number<br>of spectra | Position<br>( $\text{cm}^{-1}$ ) |  |                                             |
| –                                | –                     | –                    | 182                              |  | Lattice Vibrations                          |
| –                                | –                     | –                    | 218, 235, 275                    |  | $\nu_2(\text{UO}_2)^{2+}$ bend              |
| 323 *                            | 4.9                   | 5                    | 320, 380                         |  | $\nu_2(\text{AsO}_4)^{3-}$ bend             |
| 404 *                            | 4.6                   | 7                    | 396                              |  | $\nu_4(\text{AsO}_4)^{3-}$ bend             |
| 463                              | 6.6                   | 19                   | 446, 463                         |  |                                             |
| 821                              | 3.0                   | 25                   | 811, 818                         |  | $\nu_1(\text{UO}_2)^{2+}$ symm. stretch     |
| 886                              | 4.5                   | 16                   | 890                              |  | $\nu_3(\text{UO}_2)^{2+}$ antisymm. stretch |
| 987                              | 1.7                   | 9                    | –                                |  | unknown                                     |
| 1029 *                           | 2.8                   | 4                    | –                                |  | unknown                                     |

Twenty five individual spectra were analysed for this sample of zeunerite.

\* Low intensity or broad bands, not always visible in spectra.

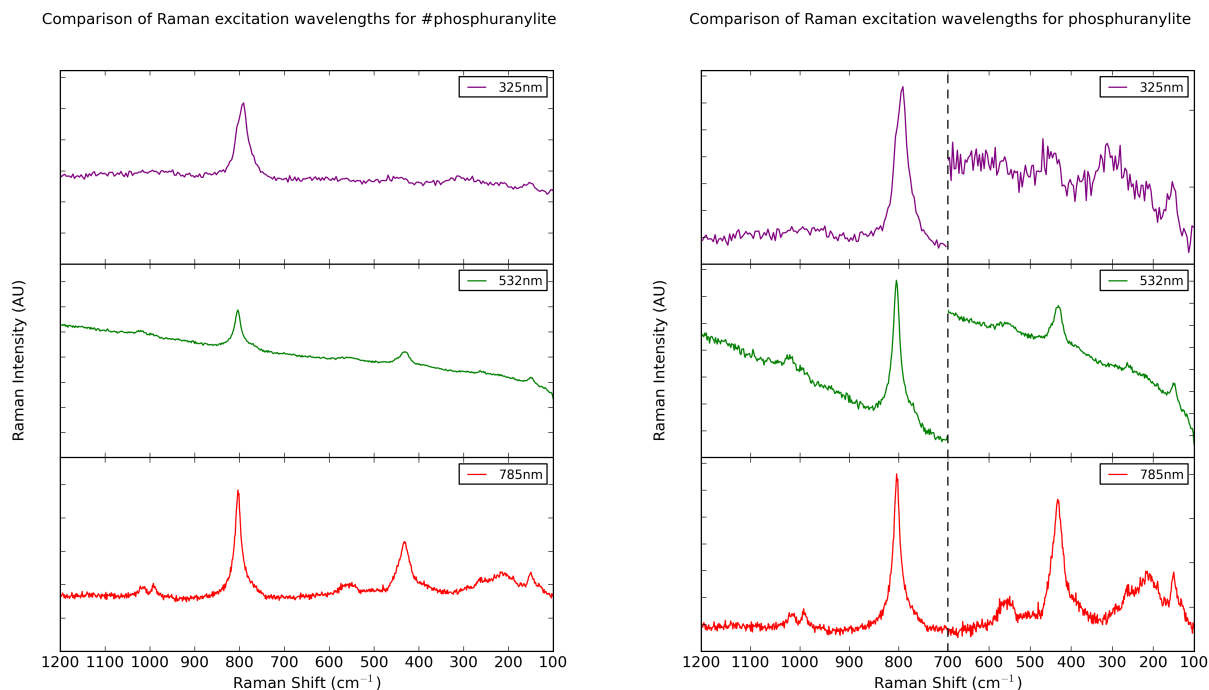

**Fig. SI 5** A comparison of the three laser wavelengths for the uranyl phosphate mineral phosphuranylite. The left figure shows the raw spectra. Each section of the spectra shown on the right have been rescaled, separately, to emphasise the bands.

**Table SI 5** Raman spectral bands for the uranyl phosphate mineral phosphuranylite

| This Study                   |                    |                   | Literature <sup>4</sup> |                                           |                              | Attribution                                                       |
|------------------------------|--------------------|-------------------|-------------------------|-------------------------------------------|------------------------------|-------------------------------------------------------------------|
| Position (cm <sup>-1</sup> ) | Standard Deviation | Number of spectra | Minerva Heights         | Saddle Ridge Position (cm <sup>-1</sup> ) | Ruggles Mine                 |                                                                   |
| 148 *                        | 2.3                | 16                | 111, 152, 175           | 117, 145, 166                             | 112, 147, 161                | Lattice Vibrations                                                |
| 216 *                        | 4.2                | 13                | 211                     | 205                                       | 208                          | v <sub>2</sub> (UO <sub>2</sub> ) <sup>2+</sup> bend              |
| 239 *                        | 3.7                | 5                 | 220                     | 227, 240                                  | 238                          |                                                                   |
| 260 *                        | 3.9                | 13                | 263                     | 267                                       | 267                          |                                                                   |
| 283 *                        | 3.4                | 5                 | 295                     | 294                                       | 287                          |                                                                   |
| 312 *                        | 5.3                | 6                 |                         |                                           |                              |                                                                   |
| 435                          | 6.0                | 25                | 404, 435, 452           | 368, 394, 417, 439                        | 396, 398, 421, 437, 452, 476 | v <sub>2</sub> (PO <sub>4</sub> ) <sup>3-</sup> bend              |
| 558 *                        | 2.7                | 7                 | 564, 613, 655           | 500, 532, 566                             | 511, 515, 536, 569, 616      | v <sub>4</sub> (PO <sub>4</sub> ) <sup>3-</sup> bend              |
| 801                          | 4.9                | 29                | 768, 793, 805, 815      | 816, 837, 843, 847                        | 812, 817, 832, 841           | v <sub>1</sub> (UO <sub>2</sub> ) <sup>2+</sup> symm. stretch     |
| –                            | –                  | –                 | –                       | –                                         | 894                          | v <sub>3</sub> (UO <sub>2</sub> ) <sup>2+</sup> antisymm. stretch |
| 992 †                        | 2.8                | 10                | 992                     | 1009                                      | 1005                         | v <sub>3</sub> (PO <sub>4</sub> ) <sup>3-</sup> antisymm. stretch |
| 1017 †                       | 1.2                | 8                 | 1016                    | 1050                                      | 1032, 1050, 1055             |                                                                   |
| –                            | –                  | –                 | 1122                    | 1125                                      | 1124                         |                                                                   |

Twenty nine individual spectra were analysed for this sample of phosphuranylite.

\* Low intensity or broad bands, not always visible in spectra.

† The 992 and 1017 cm<sup>-1</sup> bands appear together, in a small number of 785 nm spectra.

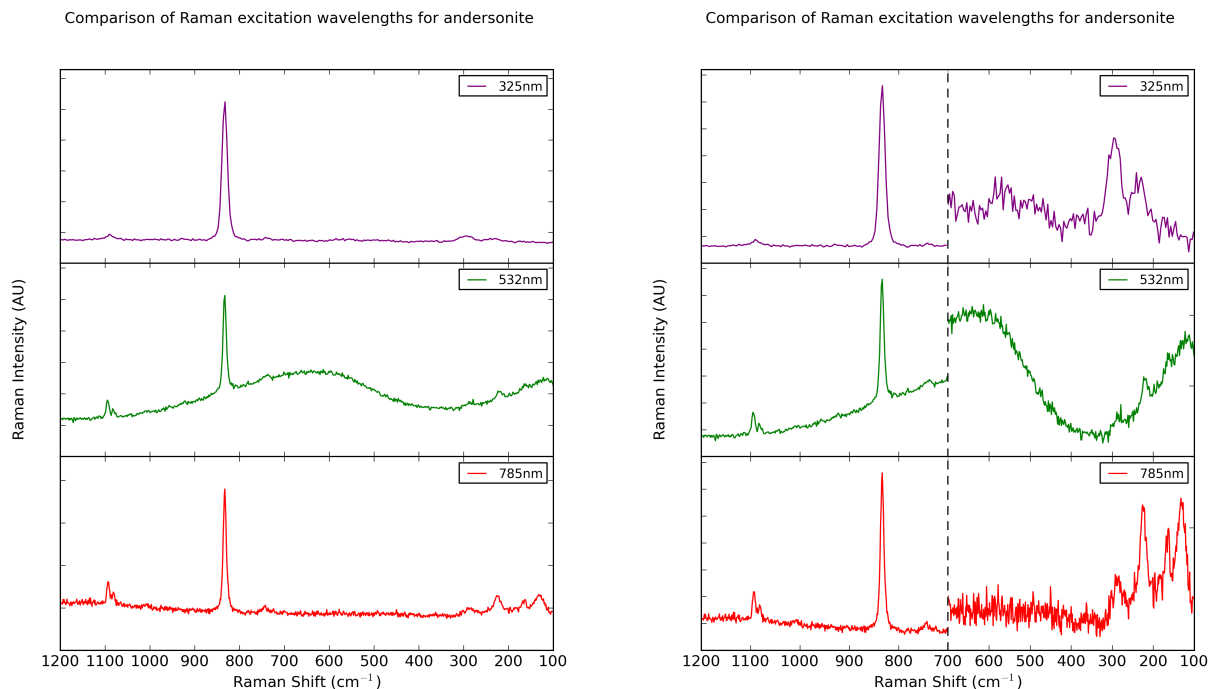

**Fig. SI 6** A comparison of the three laser wavelengths for the uranyl carbonate mineral andersonite. The left figure shows the raw spectra. Each section of the spectra shown on the right have been rescaled, separately, to emphasise the bands.

**Table SI 6** Raman spectral bands for the uranyl carbonate mineral andersonite

| Position (cm <sup>-1</sup> ) | This Study Standard Deviation | Number of spectra | Literature <sup>3</sup> Position (cm <sup>-1</sup> ) | Attribution                                 |
|------------------------------|-------------------------------|-------------------|------------------------------------------------------|---------------------------------------------|
| 130                          | 3.1                           | 7                 | 164, 182                                             | Lattice Vibrations                          |
| 225 *                        | 5.2                           | 8                 | 224, 242, 284, 299                                   | $\nu_2(\text{UO}_2)^{2+}$ bend              |
| 291 *                        | 3.3                           | 6                 |                                                      |                                             |
| 743 *                        | 2.0                           | 4                 | 697, 732, 744                                        | $\nu_4(\text{CO}_3)^{2-}$ bend              |
| 833                          | 0.5                           | 15                | 830, 833                                             | $\nu_1(\text{UO}_2)^{2+}$ symm. stretch     |
| 1092                         | 2.3                           | 15                | 1080, 1092                                           | $\nu_1(\text{CO}_3)^{2-}$ symm. stretch     |
| –                            | –                             | –                 | 1370, 1406                                           | $\nu_3(\text{CO}_3)^{2-}$ antisymm. stretch |

Fifteen individual spectra were analysed for this sample of andersonite.

\* Low intensity or broad bands, not always visible in spectra.



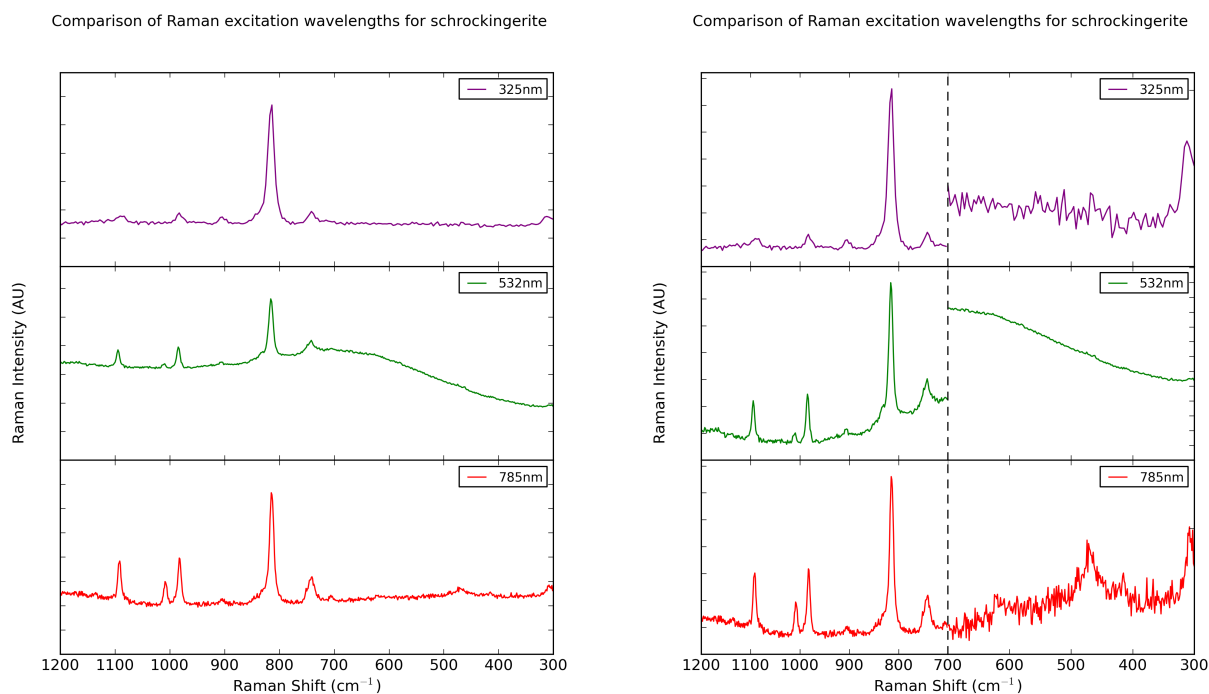

**Fig. SI 7** A comparison of the three laser wavelengths for the uranyl carbonate mineral schrockingerite. The left figure shows the raw spectra. Each section of the spectra shown on the right have been rescaled, separately, to emphasise the bands.

**Table SI 7** Raman spectral bands for the uranyl carbonate mineral schrockingerite

| Position<br>(cm <sup>-1</sup> ) | This Study            |                      | Literature <sup>6</sup>         |  | Attribution                                 |
|---------------------------------|-----------------------|----------------------|---------------------------------|--|---------------------------------------------|
|                                 | Standard<br>Deviation | Number<br>of spectra | Position<br>(cm <sup>-1</sup> ) |  |                                             |
| –                               | –                     | –                    | 157                             |  | Lattice Vibrations                          |
| 253 *                           | 0.5                   | 3                    |                                 |  |                                             |
| 307 *                           | 2.9                   | 4                    | 308                             |  | $\nu_2(\text{UO}_2)^{2+}$ bend              |
| 416 *                           | 3.8                   | 5                    |                                 |  |                                             |
| 496 *                           | 3.6                   | 6                    | 471                             |  | $\nu_2(\text{SO}_4)^{2-}$ bend              |
| 743                             | 2.1                   | 16                   | 707, 742                        |  | $\nu_4(\text{CO}_3)^{2-}$ bend              |
| 815                             | 1.0                   | 21                   | 815                             |  | $\nu_1(\text{UO}_2)^{2+}$ symm. stretch     |
| 984                             | 2.0                   | 14                   |                                 |  |                                             |
| 1009 *                          | 0.8                   | 12                   | 983                             |  | $\nu_1(\text{SO}_4)^{2-}$ symm. stretch     |
| 1093                            | 1.8                   | 12                   | 1092                            |  | $\nu_1(\text{CO}_3)^{2-}$ symm. stretch     |
| 1136                            | 3.3                   | 9                    | 1090, 1100, 1147                |  | $\nu_3(\text{SO}_4)^{2-}$ antisymm. stretch |

Twenty one individual spectra were analysed for this sample of schrockingerite.

\* Low intensity or broad bands, not always visible in spectra.

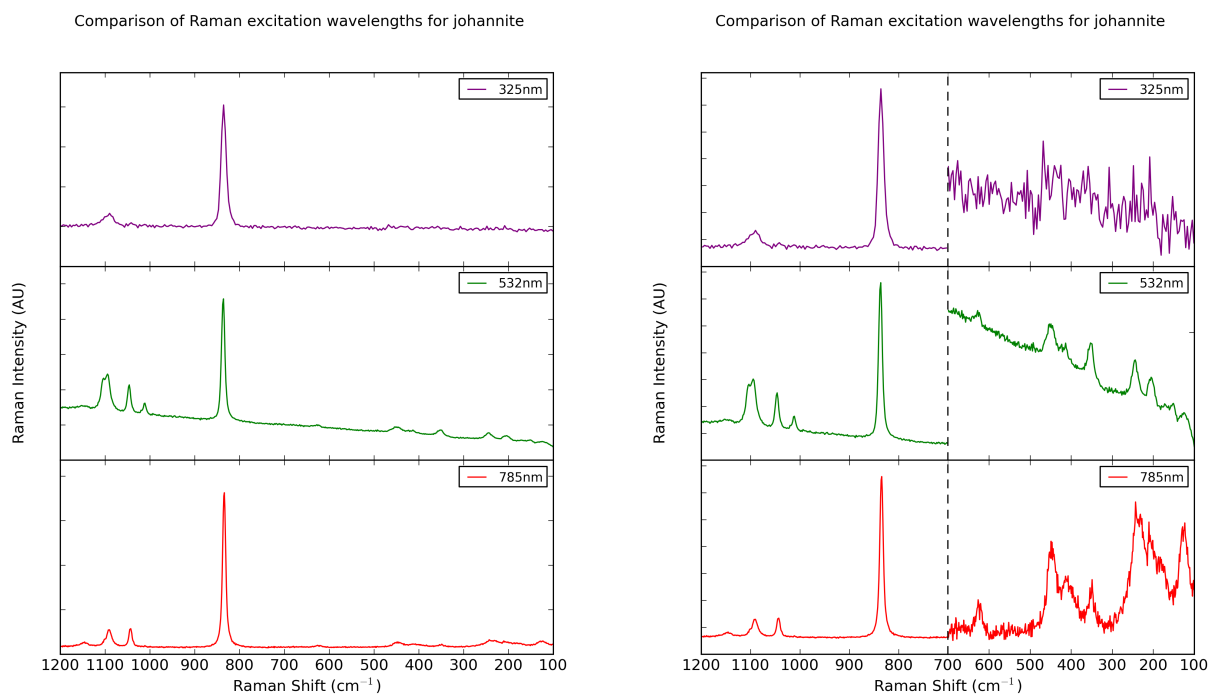

**Fig. SI 8** A comparison of the three laser wavelengths for the uranyl sulphate mineral johannite. The left figure shows the raw spectra. Each section of the spectra shown on the right have been rescaled, separately, to emphasise the bands.

**Table SI 8** Raman spectral bands for the uranyl sulphate mineral johannite

| Position (cm <sup>-1</sup> ) | This Study Standard Deviation | Number of spectra | Literature <sup>9</sup> Position (cm <sup>-1</sup> ) | Attribution                                                       |
|------------------------------|-------------------------------|-------------------|------------------------------------------------------|-------------------------------------------------------------------|
| –                            | –                             | –                 | 184                                                  | Lattice Vibrations                                                |
| 203 *                        | 3.0                           | 13                | 205                                                  | v <sub>2</sub> (UO <sub>2</sub> ) <sup>2+</sup> bend              |
| 244 *                        | 2.4                           | 10                | 277                                                  |                                                                   |
| –                            | –                             | –                 | 302                                                  | Cu-O stretch                                                      |
| 352 *                        | 0.8                           | 6                 | 384                                                  | v <sub>2</sub> (SO <sub>4</sub> ) <sup>2-</sup> bend              |
| 448 *                        | 1.7                           | 7                 | 481, 539                                             | v <sub>4</sub> (SO <sub>4</sub> ) <sup>2-</sup> bend              |
| 836                          | 1.1                           | 30                | 756, 788, 812                                        | v <sub>1</sub> (UO <sub>2</sub> ) <sup>2+</sup> symm. stretch     |
| –                            | –                             | –                 | 948, 975                                             | v <sub>3</sub> (UO <sub>2</sub> ) <sup>2+</sup> antisymm. stretch |
| 1045                         | 1.3                           | 14                | 1042                                                 | v <sub>1</sub> (SO <sub>4</sub> ) <sup>2-</sup> symm. stretch     |
| 1095                         | 3.1                           | 18                | 1009, 1100, 1147                                     | v <sub>3</sub> (SO <sub>4</sub> ) <sup>2-</sup> antisymm. stretch |

Thirty individual spectra were analysed for this sample of johannite.

\* Bands are only visible in a number of 532 and 785 nm spectra.

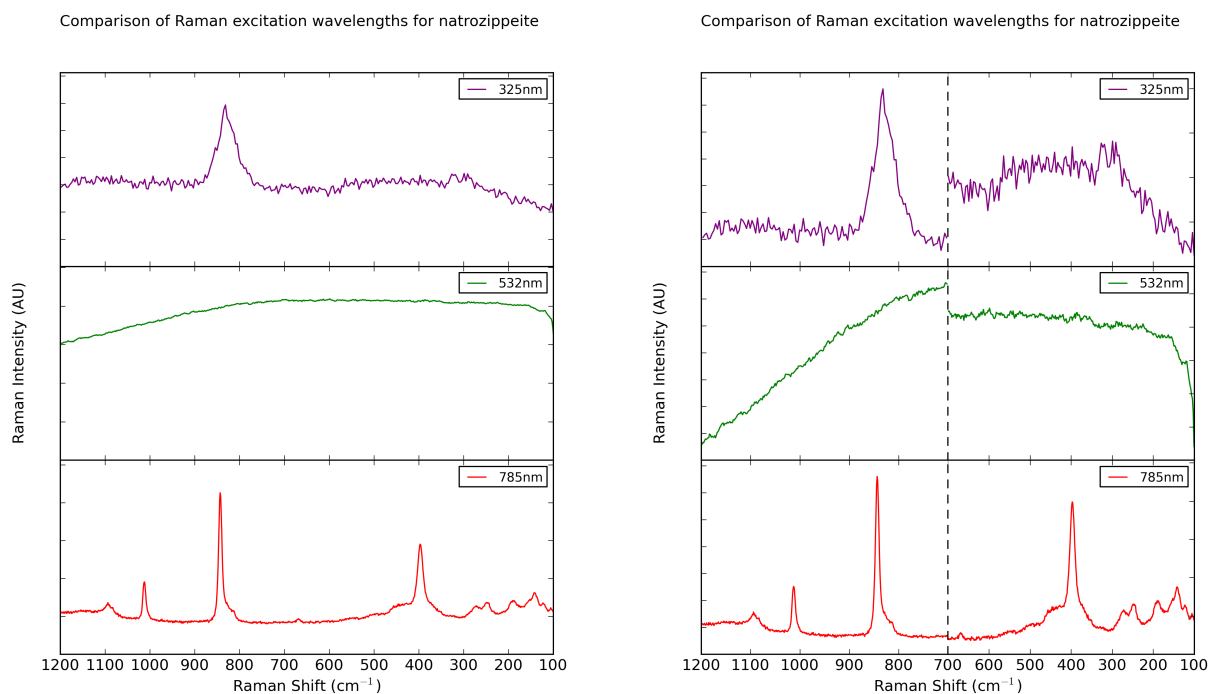

**Fig. SI 9** A comparison of the three laser wavelengths for the uranyl sulphate mineral natrozippeite. The left figure shows the raw spectra. Each section of the spectra shown on the right have been rescaled, separately, to emphasise the bands.

**Table SI 9** Raman spectral bands for the uranyl sulphate mineral natrozippeite

| Position (cm <sup>-1</sup> ) | This Study         |                   | Literature <sup>5</sup><br>Position (cm <sup>-1</sup> ) | Attribution                                 |
|------------------------------|--------------------|-------------------|---------------------------------------------------------|---------------------------------------------|
|                              | Standard Deviation | Number of spectra |                                                         |                                             |
| 191 *                        | 1.1                | 16                | 196                                                     | Lattice Vibrations                          |
| 250 *                        | 2.1                | 10                | 250                                                     | $\nu_2(\text{UO}_2)^{2+}$ bend              |
| 397                          | 1.8                | 28                | 373, 398, 431, 498                                      | $\nu_2(\text{SO}_4)^{2-}$ bend              |
| –                            | –                  | –                 | 669                                                     | $\nu_4(\text{SO}_4)^{2-}$ bend              |
| 840                          | 4.5                | 38                | 813, 823, 834, 840, 841                                 | $\nu_1(\text{UO}_2)^{2+}$ symm. stretch     |
| 1013                         | 0.7                | 21                | 980, 1007, 1010                                         | $\nu_1(\text{SO}_4)^{2-}$ symm. stretch     |
| 1094 *                       | 1.5                | 15                | 1081, 1091, 1130                                        | $\nu_3(\text{SO}_4)^{2-}$ antisymm. stretch |
| 1159 *                       | 4.1                | 12                |                                                         |                                             |

Thirty eight individual spectra were analysed for this sample of natrozippeite.

No information was forthcoming from the 532 nm spectra, as a fluorescence band drowned the region under investigation. The wavelength that gave the best spectra was 785 nm.

\* Bands are not consistently visible in all spectra.

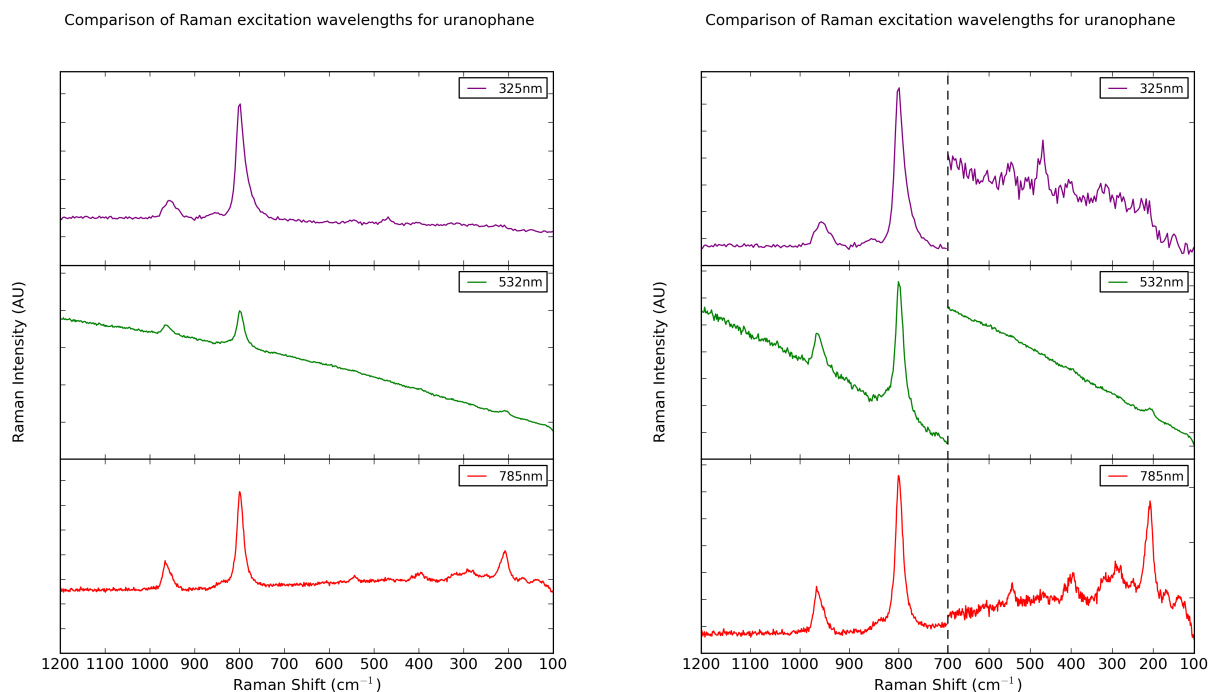

**Fig. SI 10** A comparison of the three laser wavelengths for the uranyl silicate mineral uranophane. The left figure shows the raw spectra. Each section of the spectra shown on the right have been rescaled, separately, to emphasise the bands.

**Table SI 10** Raman spectral bands for the uranyl silicate mineral uranophane

| Position (cm <sup>-1</sup> ) | This Study Standard Deviation | Number of spectra | Literature <sup>7</sup> Position (cm <sup>-1</sup> ) | Attribution                                                        |
|------------------------------|-------------------------------|-------------------|------------------------------------------------------|--------------------------------------------------------------------|
| 209 *                        | 2.8                           | 13                | 213, 250, 280, 288, 324                              | v <sub>2</sub> (UO <sub>2</sub> ) <sup>2+</sup> bend               |
| 283 *                        | 3.4                           | 6                 |                                                      |                                                                    |
| 399 *                        | 2.0                           | 6                 | 398, 469                                             | v <sub>2</sub> (SiO <sub>4</sub> ) <sup>4-</sup> bend              |
| 544 *                        | 0.9                           | 6                 | 544                                                  | v <sub>4</sub> (SiO <sub>4</sub> ) <sup>4-</sup> bend              |
| 800                          | 1.4                           | 21                | 711, 786, 792, 796                                   | v <sub>1</sub> (UO <sub>2</sub> ) <sup>2+</sup> symm. stretch      |
| 856 *                        | 1.7                           | 3                 | –                                                    | v <sub>3</sub> (UO <sub>2</sub> ) <sup>2+</sup> antisymm. stretch  |
| 961                          | 3.5                           | 16                | 960, 963                                             | v <sub>3</sub> (SiO <sub>4</sub> ) <sup>4-</sup> antisymm. stretch |

Twenty one individual spectra were analysed for the sample of uranophane.

\* Bands are not consistently visible in all spectra.

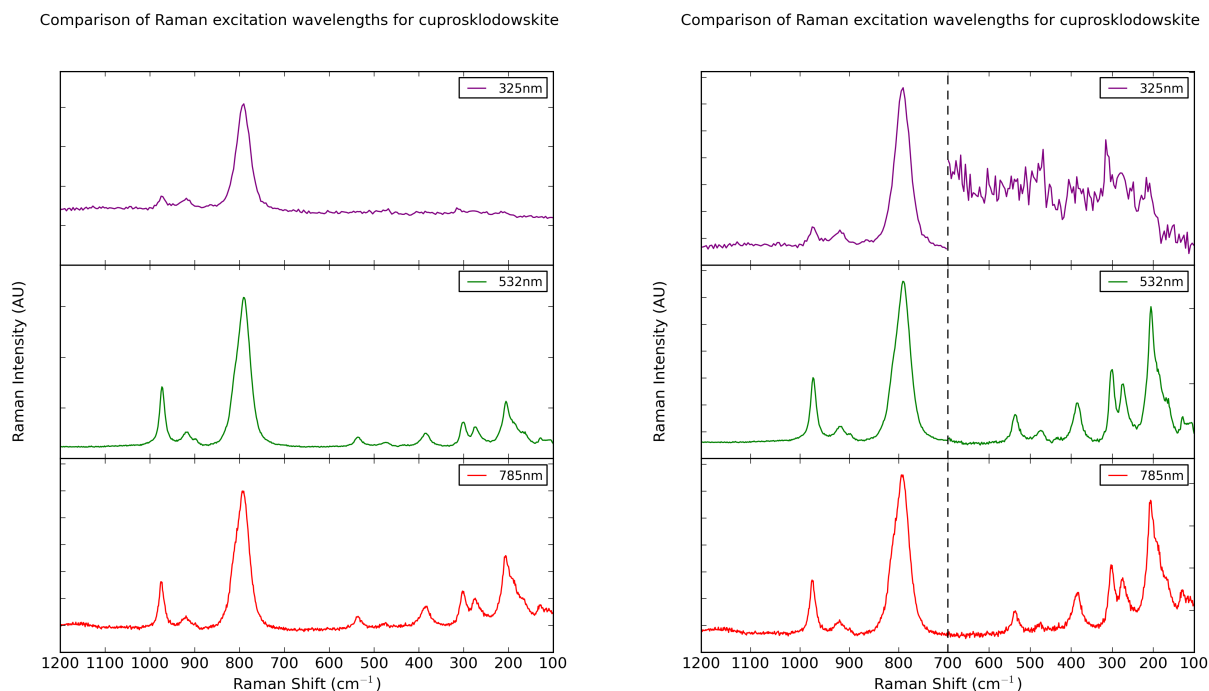

**Fig. SI 11** A comparison of the three laser wavelengths for the uranyl silicate mineral cuprosklodowskite. The left figure shows the raw spectra. Each section of the spectra shown on the right have been rescaled, separately, to emphasise the bands.

**Table SI 11** Raman spectral bands for the uranyl silicate mineral cuprosklodowskite

| Position<br>( $\text{cm}^{-1}$ ) | This Study            |                      | Literature <sup>7</sup><br>Position<br>( $\text{cm}^{-1}$ ) | Attribution                                  |
|----------------------------------|-----------------------|----------------------|-------------------------------------------------------------|----------------------------------------------|
|                                  | Standard<br>Deviation | Number<br>of spectra |                                                             |                                              |
| 203                              | 2.4                   | 13                   | 205, 217                                                    | $\nu_2(\text{UO}_2)^{2+}$ bend               |
| 273 *                            | 3.1                   | 5                    | 267, 276                                                    |                                              |
| 299 *                            | 1.0                   | 5                    | 301                                                         |                                              |
| 312 *                            | 0.9                   | 3                    |                                                             |                                              |
| 384 *                            | 0.5                   | 3                    | 411, 476                                                    | $\nu_2(\text{SiO}_4)^{4-}$ bend              |
| –                                | –                     | –                    | 507, 535                                                    | $\nu_4(\text{SiO}_4)^{4-}$ bend              |
| 792                              | 1.6                   | 19                   | 746, 758, 774, 787                                          | $\nu_1(\text{UO}_2)^{2+}$ symm. stretch      |
| 919 *                            | 2.0                   | 6                    | –                                                           | $\nu_3(\text{UO}_2)^{2+}$ antisymm. stretch  |
| 974                              | 2.1                   | 13                   | 974                                                         | $\nu_3(\text{SiO}_4)^{4-}$ antisymm. stretch |

Nineteen individual spectra were analysed for the sample of cuprosklodowskite.

\* Bands are not consistently visible in all spectra.

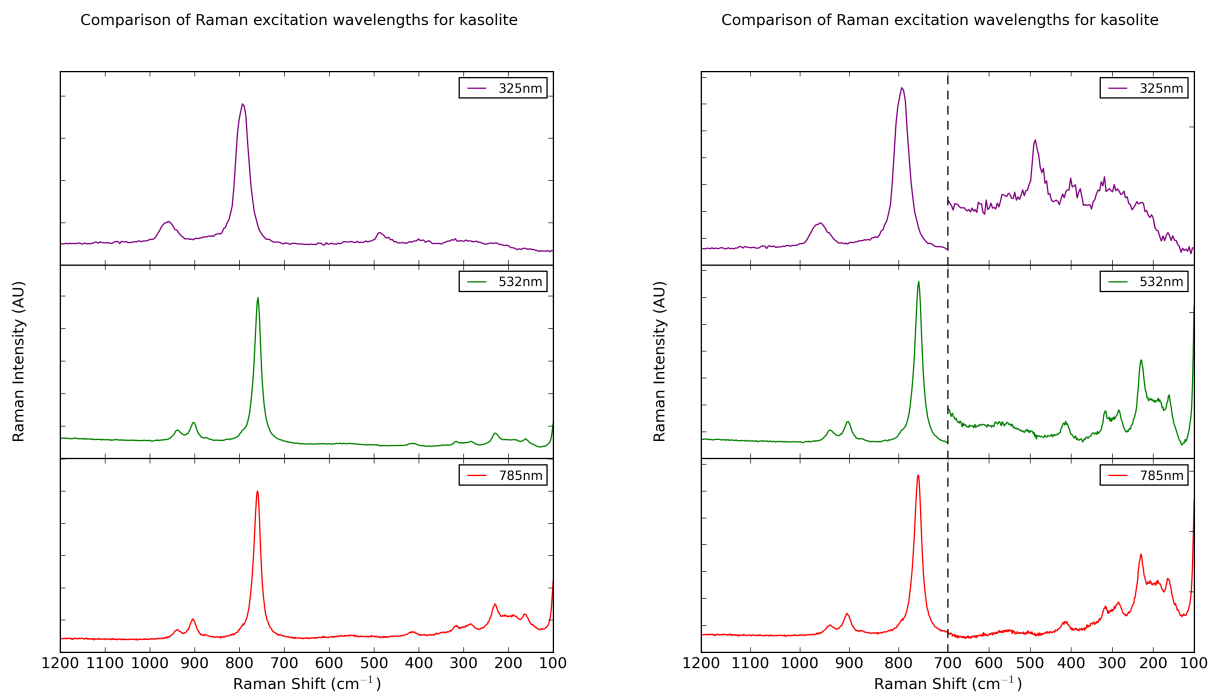

**Fig. SI 12** A comparison of the three laser wavelengths for the uranyl silicate mineral kasolite. The left figure shows the raw spectra. Each section of the spectra shown on the right have been rescaled, separately, to emphasise the bands.

**Table SI 12** Raman spectral bands for the uranyl silicate mineral kasolite

| Position (cm <sup>-1</sup> ) | This Study Standard Deviation | Number of spectra | Literature <sup>7</sup> Position (cm <sup>-1</sup> ) | Attribution                                  |
|------------------------------|-------------------------------|-------------------|------------------------------------------------------|----------------------------------------------|
| 196                          | 8.5                           | 8                 | 154, 165, 185                                        | Lattice Vibrations                           |
| 230                          | 0.5                           | 8                 | 217, 231, 234, 285, 302                              | $\nu_2(\text{UO}_2)^{2+}$ bend               |
| 415 *                        | 1.0                           | 3                 | 415, 454                                             | $\nu_2(\text{SiO}_4)^{4-}$ bend              |
| –                            | –                             | –                 | 501, 533, 575                                        | $\nu_4(\text{SiO}_4)^{4-}$ bend              |
| 760                          | 0.5                           | 9                 | 721, 750, 758, 766, 793                              | $\nu_1(\text{UO}_2)^{2+}$ symm. stretch      |
| 904                          | 0.9                           | 8                 | 903                                                  | $\nu_3(\text{UO}_2)^{2+}$ antisymm. stretch  |
| 939                          | 0.9                           | 6                 | –                                                    | $\nu_3(\text{SiO}_4)^{4-}$ antisymm. stretch |

Nine individual spectra were analysed for this sample of kasolite.

\* Bands are not consistently visible in all spectra.

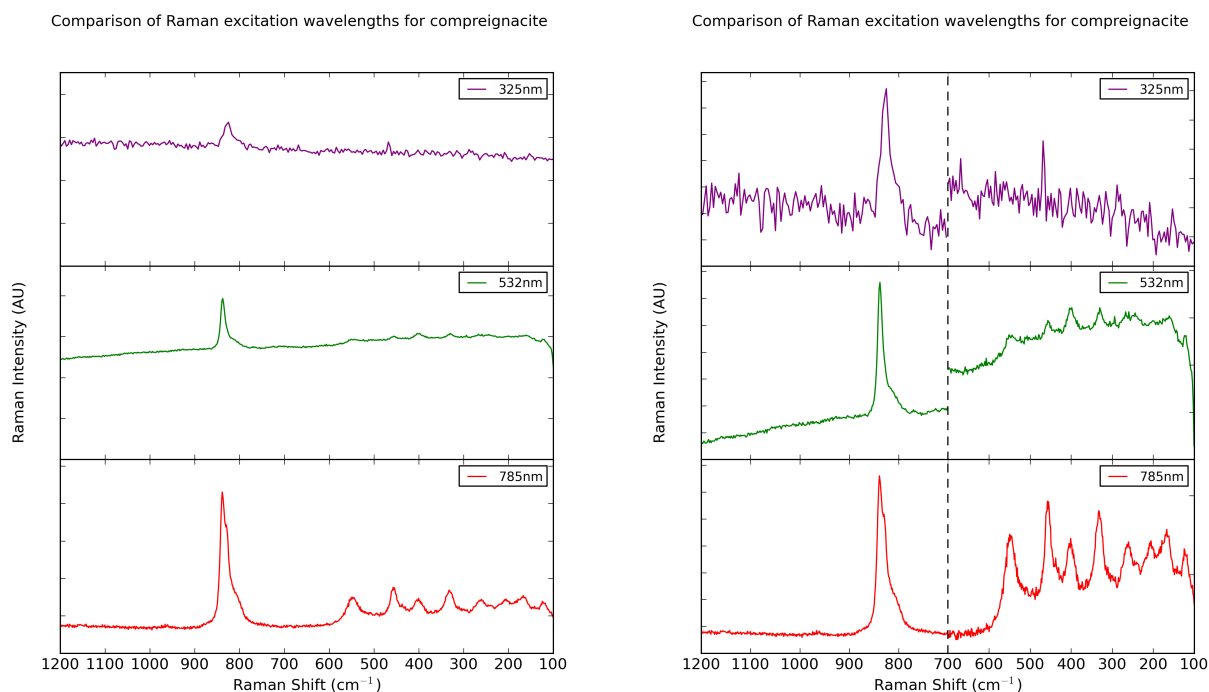

**Fig. SI 13** A comparison of the three laser wavelengths for the uranyl hydrate mineral compreignacite. The left figure shows the raw spectra. Each section of the spectra shown on the right have been rescaled, separately, to emphasise the bands.

**Table SI 13** Raman spectral bands for the uranyl silicate mineral compreignacite

| Position (cm <sup>-1</sup> ) | This Study         |                   | Literature <sup>8</sup>                        |  | Attribution                             |
|------------------------------|--------------------|-------------------|------------------------------------------------|--|-----------------------------------------|
|                              | Standard Deviation | Number of spectra | Position (cm <sup>-1</sup> )                   |  |                                         |
| 164 *                        | 3.0                | 6                 | 153                                            |  | Lattice Vibrations                      |
| 204 *                        | 1.9                | 7                 | 197, 253                                       |  | $\nu_2(\text{UO}_2)^{2+}$ bend          |
| 329 *                        | 5.3                | 10                | –                                              |  | unknown                                 |
| 402 *                        | 3.7                | 8                 | 439                                            |  | $\nu(\text{U}_3\text{O})$ stretch       |
| 460 *                        | 5.0                | 12                | –                                              |  | unknown                                 |
| 549                          | 1.1                | 7                 | 602, 687                                       |  | U-O-H bend and water liberation         |
| 834 †                        | 4.24               | 38                | 824, 848                                       |  | $\nu_1(\text{UO}_2)^{2+}$ symm. stretch |
| –                            | –                  | –                 | 1010, 1050, 1080, 1110, 1160, 1190, 1330, 1454 |  | U-O-H bending                           |

Thirty eight individual spectra were analysed for this sample of compreignacite.

\* Bands are not consistently visible in all spectra.

† A smaller peak or shoulder is sometimes present about 804 cm<sup>-1</sup> in 785 nm spectra, or about 858 cm<sup>-1</sup> in 325 nm spectra.

### 3 Analysis of the EDX data

**Table SI 14** The EDX analysis of the minerals in this investigation

| Mineral Name      | Atomic Percentage ( $\pm 1\%$ ), averaged over multiple spectra |      |     |     |     |     |     |      |     |     |     |     |     |
|-------------------|-----------------------------------------------------------------|------|-----|-----|-----|-----|-----|------|-----|-----|-----|-----|-----|
|                   | U                                                               | O    | P   | As  | Si  | S   | Cu  | Ca   | Mg  | Na  | K   | Pb  | F   |
| Autunite          | 7.5                                                             | 81.1 | 5.9 | 0.8 |     |     |     | 3.7  |     |     |     |     |     |
| Torbernite        | 8.3                                                             | 80.3 | 7.6 | 0.2 |     |     | 3.7 |      |     |     |     |     |     |
| Nováčekite        | 6.3                                                             | 86.8 | 0.9 | 3.8 |     |     |     |      | 2.2 |     |     |     |     |
| Zeunerite         | 8.4                                                             | 80.0 | 1.7 | 6.3 |     |     | 3.6 |      |     |     |     |     |     |
| Phosphuranylite   | 8.7                                                             | 77.5 | 5.5 | 0.4 |     |     |     | 3.8  |     |     | 2.2 |     |     |
| Andersonite       | 3.2                                                             | 74.4 |     |     |     | 4.1 |     | 9.6  |     | 3.2 |     |     | 5.5 |
| Schröckingerite   | 4.9                                                             | 69.5 |     |     |     | 4.1 |     | 13.7 |     | 2.6 |     |     | 5.1 |
| Johannite         | 6.1                                                             | 80.4 |     |     | 2.0 | 5.6 | 4.2 |      |     |     |     |     |     |
| Natrozippeite     | 12.2                                                            | 77.1 |     |     |     | 5.6 |     |      |     | 5.1 |     |     |     |
| Uranophane        | 7.5                                                             | 80.7 |     |     | 7.7 |     |     | 3.0  |     |     |     |     |     |
| Cuprosklodowskite | 7.3                                                             | 77.1 | 1.5 | 1.4 | 9.2 |     | 2.6 |      |     |     |     |     |     |
| Kasolite          | 7.1                                                             | 76.4 |     |     | 7.0 |     |     |      |     |     |     | 6.8 |     |
| Compreignacite    | 12.1                                                            | 80.7 |     |     | 1.9 | 3.0 |     |      |     |     | 2.3 |     |     |

Carbon is not shown in the EDX, as the percentage is too high to reliably predict the mineral composition. This is likely due to the presence of carbon in the background rock and the carbon tape used to mount the sample.

The percentage values shown here only consider the elements present in significant quantities; any elements that were present below 1% have not been included in this table and may be considered as part of the background rock.

The concentration of uranium is typically slightly higher than expected from the ratio of polyanion, which may be explained by the presence of uranium in the background rock. The only difference to this is for the uranyl silicates, where the silicon ratio tends to be higher than the uranium. However, silicon was seen in trace quantities for almost all spectra, often alongside aluminium and other elements. Overall, the ratios of uranium to polyanion generally agree with literature values.

The layered structure seen in the majority of minerals allows for cations to move through the interlayer space, which may account for the cation ratio variation in different samples. A cation deficiency is seen in natrozippeite, uranophane, cuprosklodowskite and compreignacite. The most significant deviation from theoretical composition are seen in the uranyl carbonate mineral andersonite. The theoretical formula has a 2:1 ratio of sodium:calcium, whereas the EDX seen here contains significantly more calcium, alongside the unexpected presence of sulphur and fluorine. These elements may be explained by the presence of gypsum ( $\text{CaSO}_4$ , reported by Elton and Hooper<sup>1</sup>) and perhaps fluorspar ( $\text{CaF}_2$ ), which are both common components of gangue (the host-rock).

**Table SI 15** Estimation of the chemical composition for the minerals in this investigation, based on the EDX spectra

| Mineral           | Theoretical Composition                                                                      | Estimate from EDX                                                       |
|-------------------|----------------------------------------------------------------------------------------------|-------------------------------------------------------------------------|
| Autunite          | $\text{Ca}(\text{UO}_2)_2(\text{PO}_4)_2 \cdot 11\text{H}_2\text{O}$                         | $\text{Ca}(\text{UO}_2)_2(\text{PO}_4)_{1.6}(\text{AsO}_4)_{0.2}$       |
| Torbernite        | $\text{Cu}(\text{UO}_2)_2(\text{PO}_4)_2 \cdot 12\text{H}_2\text{O}$                         | $\text{Cu}_{0.9}(\text{UO}_2)_2(\text{PO}_4)_{1.8}$                     |
| Zeunerite         | $\text{Cu}(\text{UO}_2)_2(\text{AsO}_4)_2 \cdot 12\text{H}_2\text{O}$                        | $\text{Cu}_{0.9}(\text{UO}_2)_2(\text{PO}_4)_{0.4}(\text{AsO}_4)_{1.5}$ |
| Nováčekite        | $\text{Mg}(\text{UO}_2)_2(\text{AsO}_4)_2 \cdot 12\text{H}_2\text{O}$                        | $\text{Mg}_{0.7}(\text{UO}_2)_2(\text{PO}_4)_{0.3}(\text{AsO}_4)_{1.2}$ |
| Phosphuranylite   | $\text{Ca}(\text{UO}_2)_3(\text{PO}_4)_2(\text{OH})_2 \cdot 6\text{H}_2\text{O}$             | $\text{K}_{0.7}\text{Ca}_{1.3}(\text{UO}_2)_3(\text{PO}_4)_{1.9}$       |
| Andersonite       | $\text{Na}_2\text{Ca}(\text{UO}_2)(\text{CO}_3)_3 \cdot 6\text{H}_2\text{O}$                 | $\text{NaCa}_3(\text{UO}_2)(\text{SO}_4)_{1.3}\text{F}_{1.7}$           |
| Schröckingerite   | $\text{NaCa}_3(\text{UO}_2)(\text{CO}_3)_3(\text{SO}_4)\text{F} \cdot 10\text{H}_2\text{O}$  | $\text{Na}_{0.5}\text{Ca}_{2.8}(\text{UO}_2)(\text{SO}_4)_{0.8}$        |
| Johannite         | $\text{Cu}(\text{UO}_2)_2(\text{OH})_2(\text{SO}_4)_2 \cdot 8\text{H}_2\text{O}$             | $\text{Cu}_{1.4}(\text{UO}_2)_2(\text{SO}_4)_{1.8}$                     |
| Natrozippeite     | $\text{Na}_5(\text{UO}_2)_8(\text{SO}_4)_4\text{O}_5(\text{OH})_3 \cdot 8\text{H}_2\text{O}$ | $\text{Na}_{2.5}(\text{UO}_2)_6(\text{SO}_4)_{2.7}$                     |
| Uranophane        | $\text{Ca}(\text{UO}_2)_2(\text{SiO}_4)_2 \cdot 5\text{H}_2\text{O}$                         | $\text{Ca}_{0.8}(\text{UO}_2)_2(\text{SiO}_4)_{2.1}$                    |
| Kasolite          | $\text{Pb}(\text{UO}_2)(\text{SiO}_4) \cdot 2\text{H}_2\text{O}$                             | $\text{Pb}(\text{UO}_2)(\text{SiO}_4)$                                  |
| Cuprosklodowskite | $\text{Cu}(\text{UO}_2)_2(\text{SiO}_4)_2 \cdot 6\text{H}_2\text{O}$                         | $\text{Cu}_{0.7}(\text{UO}_2)_2(\text{SiO}_4)_{2.5}$                    |
| Compreignacite    | $\text{K}_2(\text{UO}_2)_6\text{O}_4(\text{OH})_6 \cdot 7\text{H}_2\text{O}$                 | $\text{K}_{1.2}(\text{UO}_2)_6$                                         |



---

## References

- 1 N. J. Elton and J. J. Hooper. Andersonite and schrockingerite from geevor mine, cornwall: two species new to britain. *Mineralogical Notes*, page 124, 1999.
- 2 R. L. Frost. An infrared and raman spectroscopic study of the uranyl micas. *Spectrochimica Acta, Part A*, 60:1469, 2004.
- 3 R. L. Frost, O. Carmody, K. L. Erickson, M. L. Weier, and J. Cejka. Molecular structure of the uranyl mineral andersonite - a raman spectroscopic study. *Journal of Molecular Structure*, 703:47–53, 2004.
- 4 R. L. Frost, J. Cejka, and G. Ayoko. Raman spectroscopic study of the uranyl phosphate minerals phosphuranylite and yingjiangite. *Journal of Raman Spectroscopy*, 39:495, 2008.
- 5 R. L. Frost, J. Cejka, G. Ayoko, and M. L. Weier. Raman spectroscopic and sem analysis of sodium-zippeite. *Journal of Raman Spectroscopy*, 38:1311, 2007.
- 6 R. L. Frost, J. Cejka, G. A. Ayoko, and M. J. Dickfos. Raman spectroscopic study of the multi-anion mineral schrockingerite. *Journal of Raman Spectroscopy*, 38:1609, 2007.
- 7 R. L. Frost, J. Cejka, M. L. Weier, and W. Martens. Molecular structure of the uranyl silicates - a raman spectroscopic study. *Journal of Raman Spectroscopy*, 37:538, 2006.
- 8 R. L. Frost, M. J. Dickfos, and J. Cejka. Raman spectroscopic study of the uranyl mineral com-preignacite. *Journal of Raman Spectroscopy*, 39:1158, 2008.
- 9 R. L. Frost, K. L. Erickson, J. Cejka, and B. J. Reddy. A raman spectroscopic study of the uranyl sulphate mineral johannite. *Spectrochimica Acta, Part A*, 61:2702, 2005.
- 10 R. L. Frost and M. L. Weier. Hot-stage raman spectroscopic study of the thermal decomposition of saleeite. *Journal of Raman Spectroscopy*, 35:299, 2004.
- 11 R. L. Frost, M. L. Weier, and M. O. Adebajo. Thermal decomposition of metazeunerite - a high resolution thermogravimetric and hot-stage raman spectroscopic study. *Thermochimica Acta*, 419:119, 2004.
